# Supplementary material for: Improvement of brightness, color purity, and operational stability of electrochemiluminescence devices with diphenylanthracene derivatives
Source: Royal Society of Chemistry journal article supplement (doi:10.1039/c7tc03389c), 2017-01-01
Supplement: c7tc03389c1.pdf [file c7tc03389c1.pdf]

## Supporting Information

### **Improvement of Brightness, Color Purity, and Operational Stability of Electrochemiluminescence Devices with Diphenylanthracene Derivatives**

**Heedong Hwang and Jin Kon Kim\***

National Creative Research Initiative Center for Smart Block Copolymers,

Department of Chemical Engineering, Pohang University of Science and Technology,

Pohang, Kyungbuk 790-784, Republic of Korea

**Hong Chul Moon\***

Department of Chemical Engineering, University of Seoul, Seoul 02504, Republic of Korea

\* To whom correspondence should be addressed (jkkim@postech.ac.kr, hcmoon@uos.ac.kr)

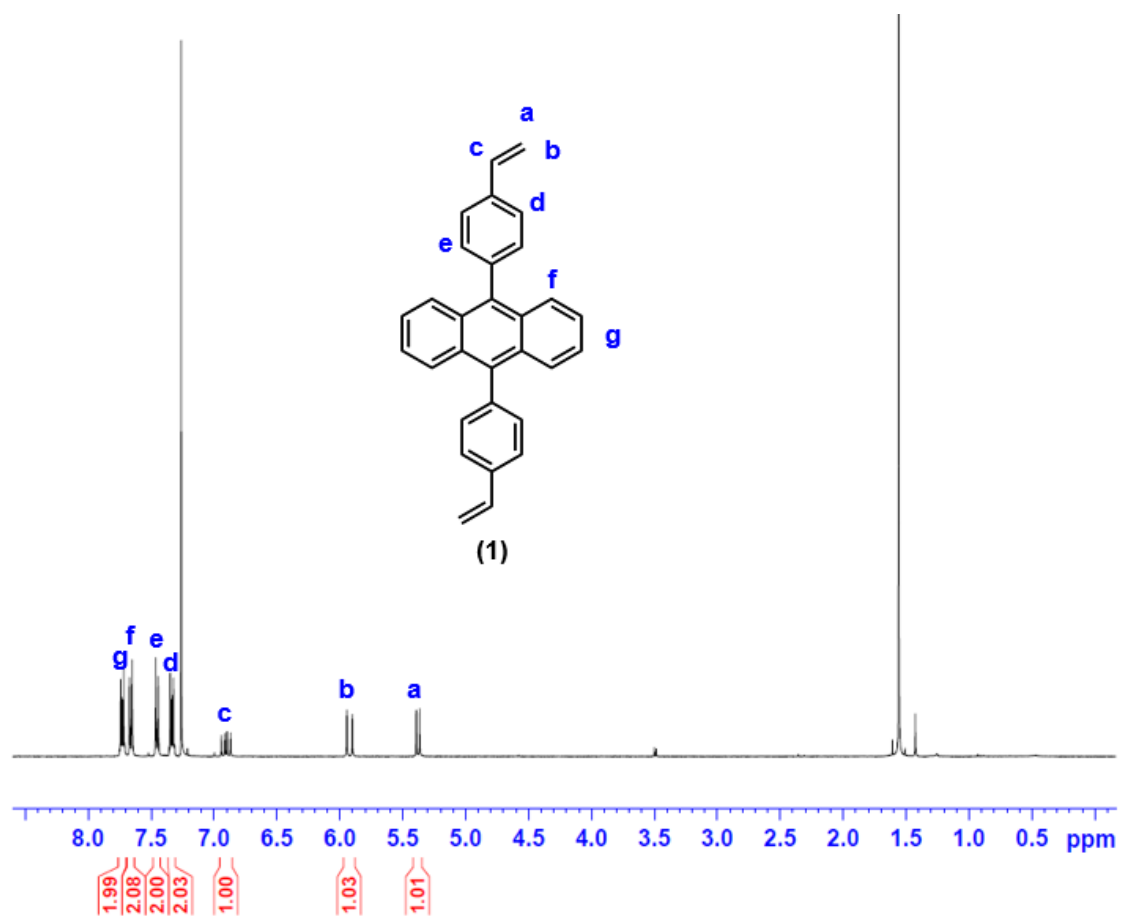

**Fig. S1**  $^1\text{H}$ -NMR spectrum of species **1**.

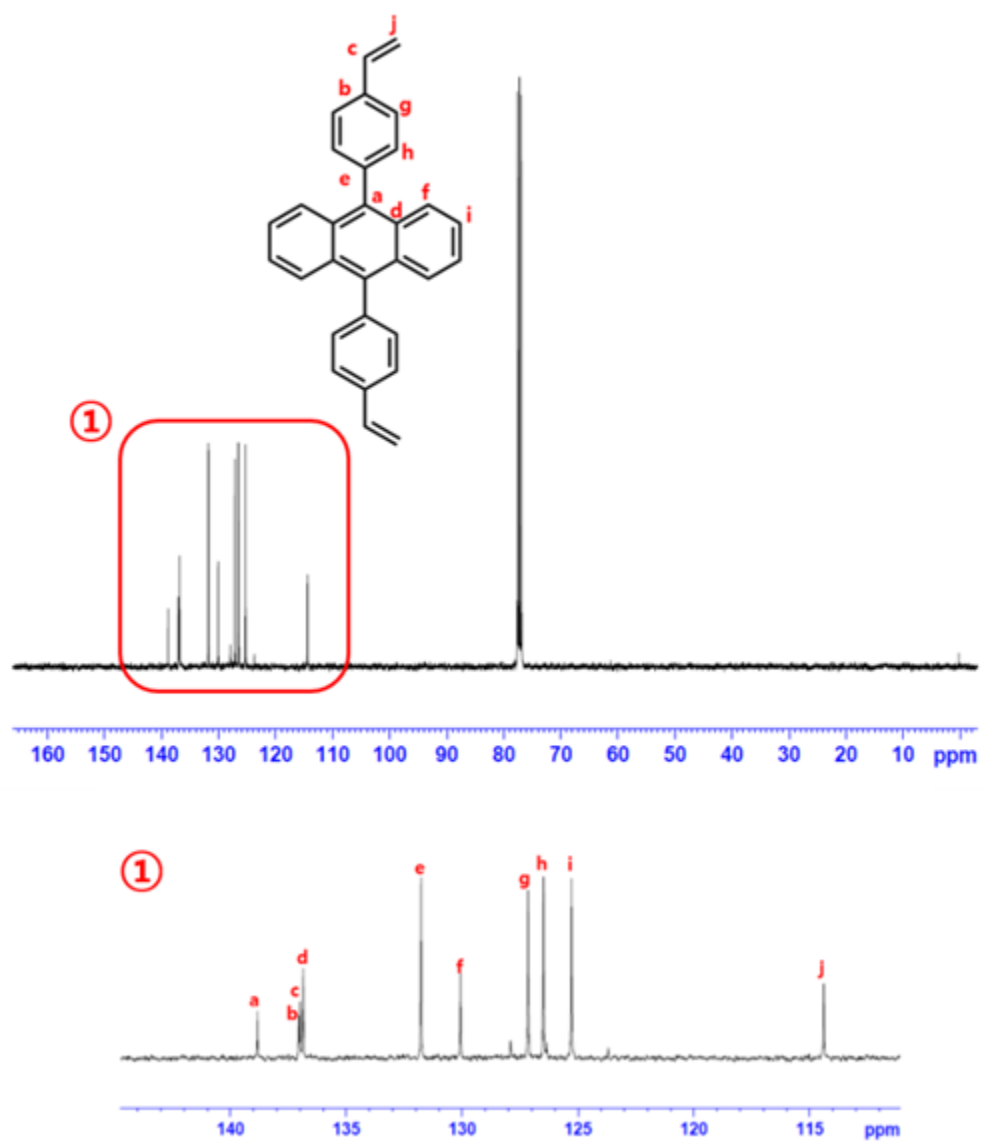

**Fig. S2**  $^{13}\text{C}$ -NMR spectrum of species **1**.

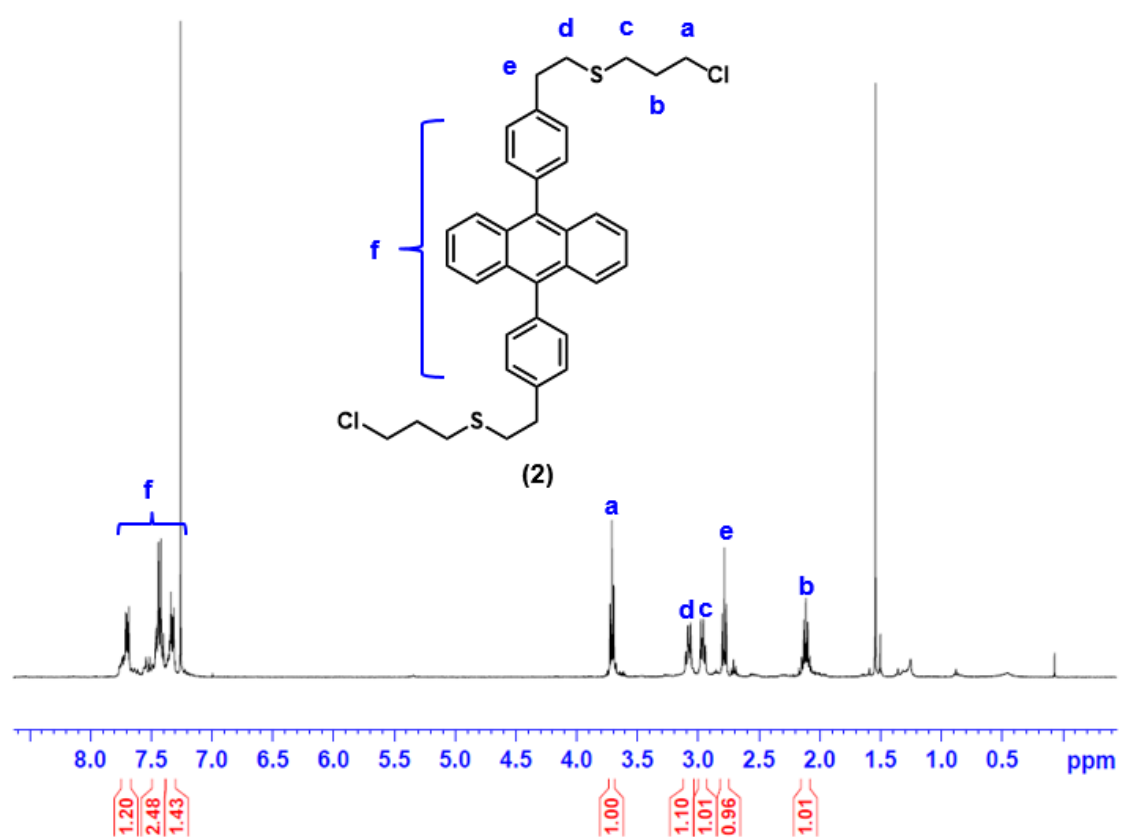

**Fig. S3**  $^1\text{H}$ -NMR spectrum of species **2**.

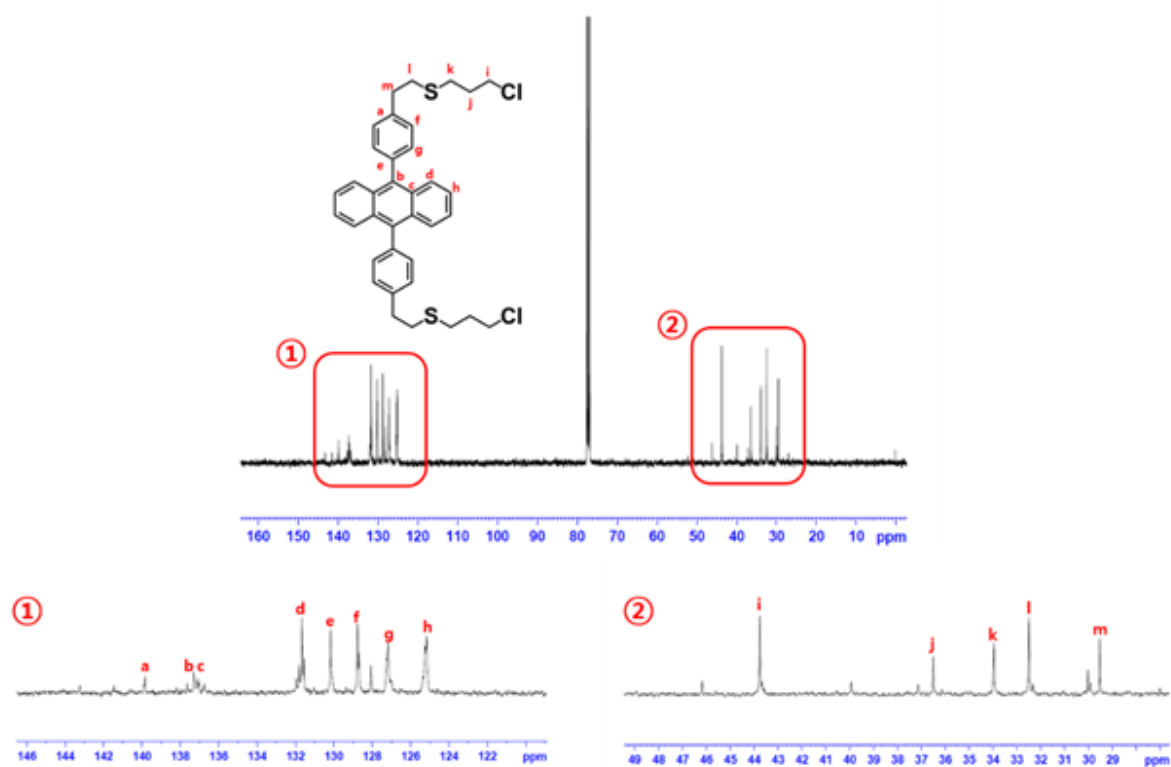

**Fig. S4**  $^{13}\text{C}$ -NMR spectrum of species 2.

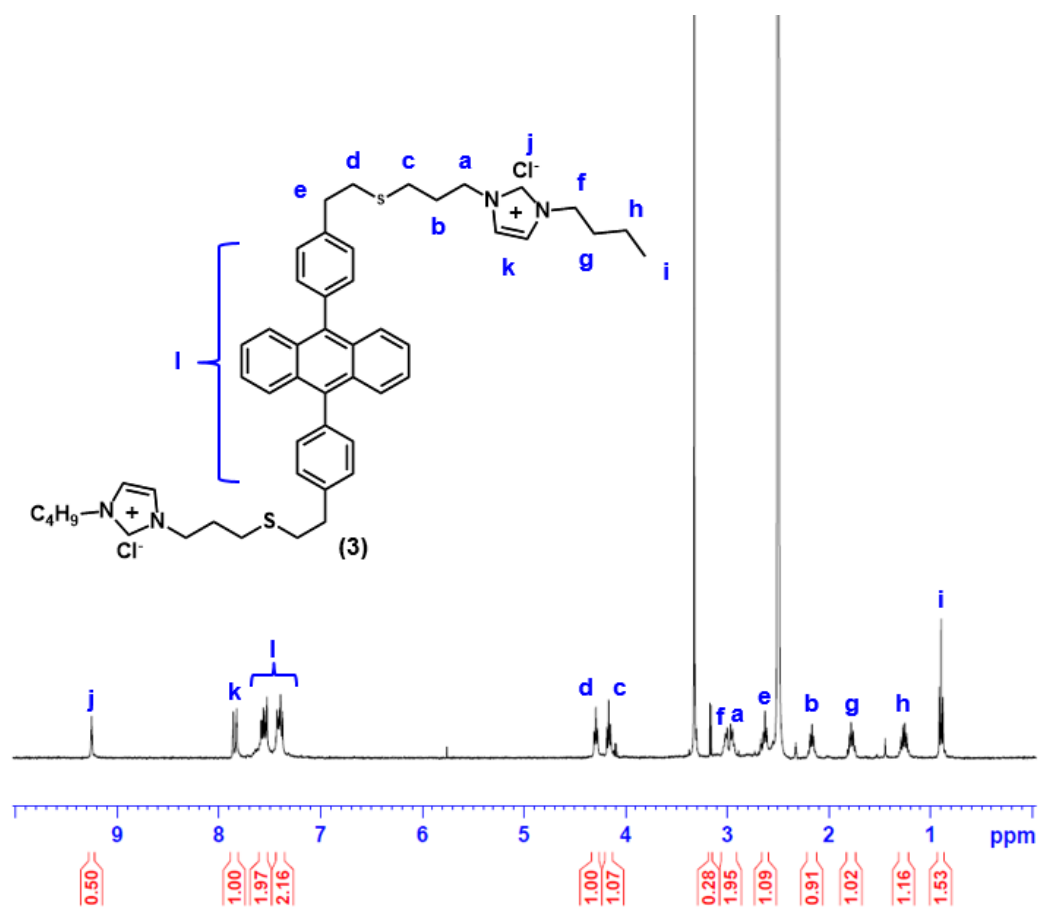

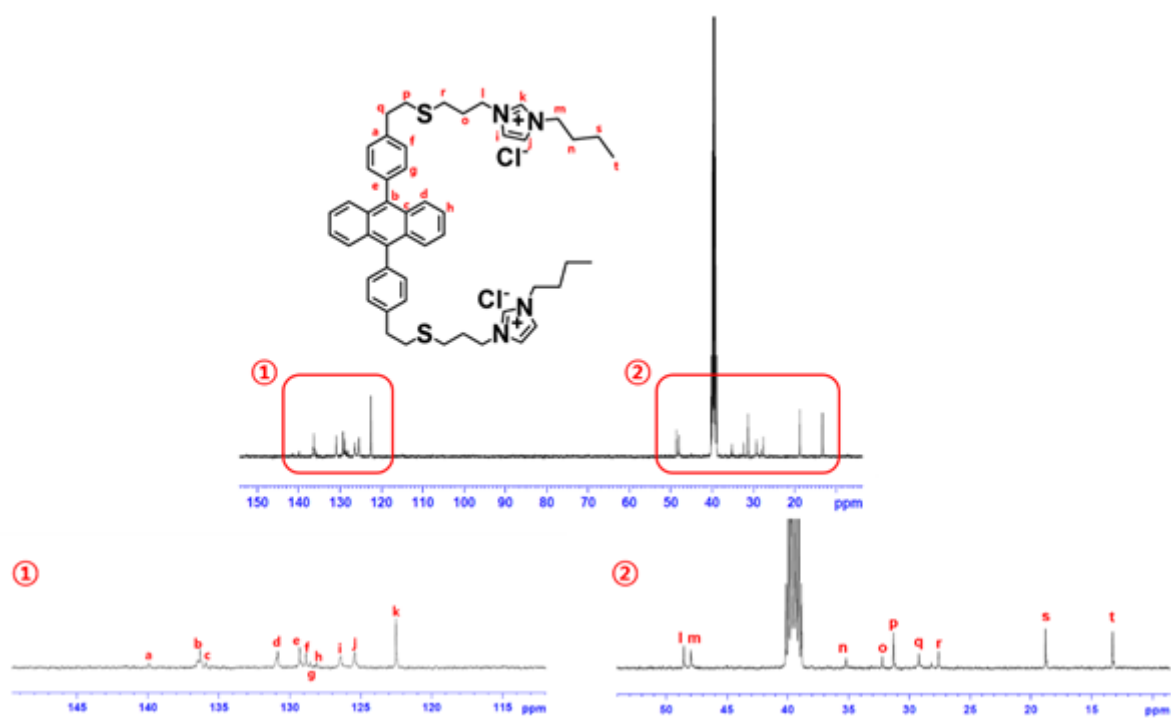

**Fig. S6**  $^{13}\text{C}$ -NMR spectrum of species **3**.

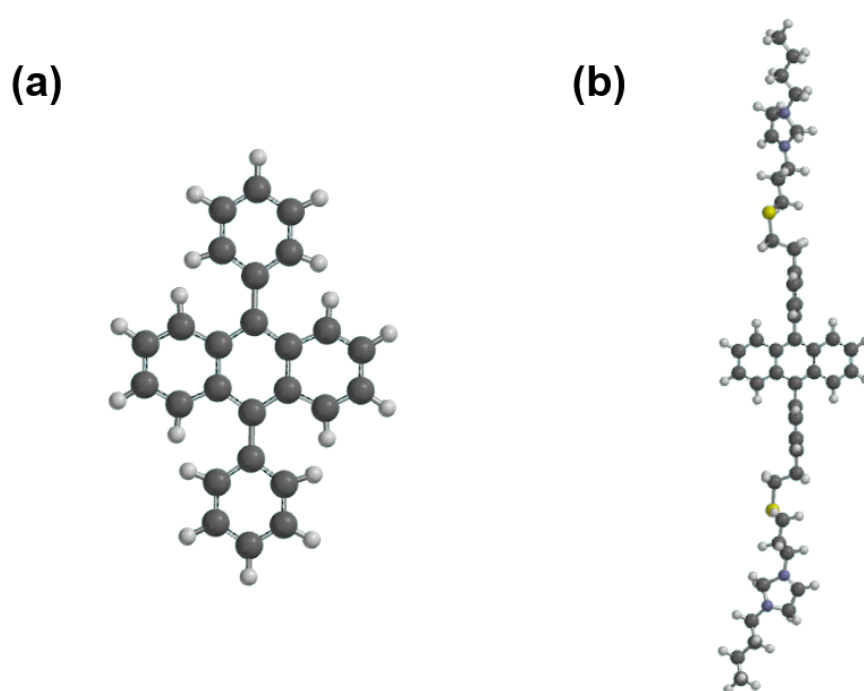

**Fig. S7** Optimized molecular structures of (a) DPA and (b) I-DPA simulated by density functional theory (DFT, B3LYP method with 6-31G\*). Dihedral angles between a center of anthracene and both linked phenyl rings of I-DPA and DPA were estimated as  $80^\circ$  and  $0^\circ$ , respectively, implying the co-planarity of I-DPA is further broken than DPA.



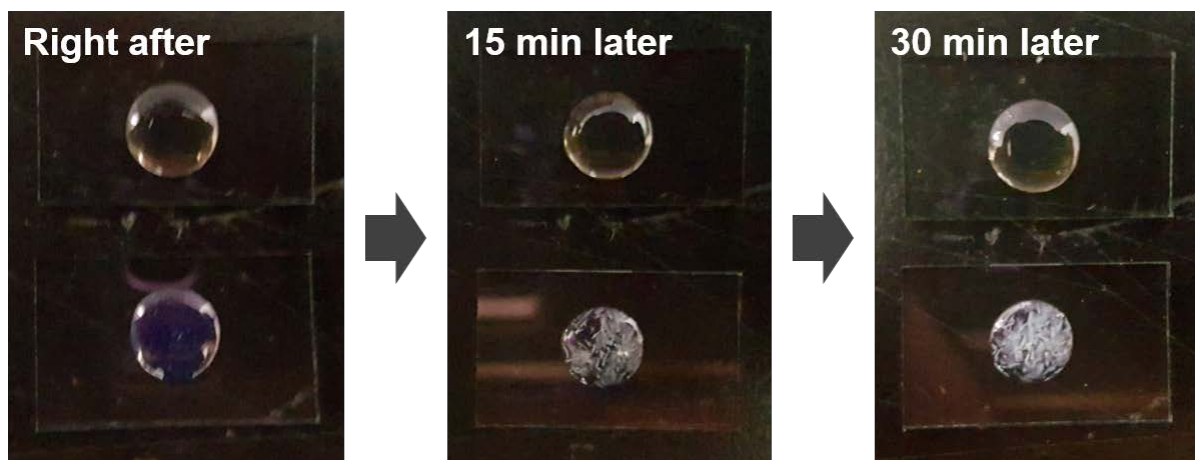

**Fig. S8** Photographs of ECL gels containing I-DPA (top) and DPA (bottom) at 25 °C as a function of time. The homogeneous I-DPA and DPA gels were prepared at 25 °C and 80 °C, respectively, for full dissolution of polyvinylacetate (PVAc,  $M_w = 500k$ ). However, when each ECL gel was placed on ITO-coated glasses (electrodes) at 25 °C for device fabrication, the gel with the DPA became turbid due to poor compatibility between DPA and PVAc. Therefore, only I-DPA could be used for the fabrication of gel-based ECL devices at room temperature.
